# Supplementary material
Source: MDPI journal article supplement (https://www.mdpi.com/2673-4176/5/2/6)
Supplement: s1 [file s1]

Archive with 1 entries (1 files):
- polysaccharides-2930302-supplementary.pdf
